# Supplementary material for: Coronavirus genomic cDNA derived G-quadruplex as a selective target for fluorometric detection
Source: Royal Society of Chemistry journal article supplement (doi:10.1039/d3cc00740e), 2023-01-01

Electronic Supplementary Information

**Coronavirus genomic cDNA derived G-Quadruplex as selective target for fluorometric detection**

Sumon Pratihar,<sup>a</sup> Mohamed Nabeel Mattath,<sup>a</sup> Thimmaiah Govindaraju<sup>a\*</sup>

<sup>a</sup>Bioorganic Chemistry Laboratory, New Chemistry Unit, Jawaharlal Nehru Centre for Advanced Scientific Research (JNCASR), Jakkur, P.O., Bengaluru, 560064 Karnataka, India.

*\*Corresponding Author (T.G) Email: [tgraju@jncasr.ac.in](mailto:tgraju@jncasr.ac.in)*

| <b>Contents</b>                                                                                 | <b>Page No.</b> |
|-------------------------------------------------------------------------------------------------|-----------------|
| 1. General Information                                                                          | S2              |
| 2. Structure of probes <b>1-11</b> and synthesis of TPAEB ( <b>12</b> ) and TPAMB ( <b>13</b> ) | S2              |
| 3. Fluorescence screening of molecular probes with cDNA GQs                                     | S3              |
| 4. Jobs plot analysis for interaction of TPAMB with cDNA5                                       | S4              |
| 5. Gel electrophoresis of TPAMB with cDNA GQ                                                    | S4              |
| 6. Tables                                                                                       | S5              |
| Table S1. List of identified sequences with -CC- repeats                                        | S5              |
| Table S2. Photophysical properties of the probes TPAEB and TPAMB                                | S5              |
| Table S3. Summary of fluorescence decay of TPAMB with respect to different DNA targets          | S5              |
| Table S4. List of DNA and RNA sequences used in the work                                        | S6              |
| 7. Figures                                                                                      | S7              |
| Fig. S1. Chemical structure of probes 1-11                                                      | S7              |
| Fig. S2. Synthesis of molecular probes TPAMB and TPAEB                                          | S7              |
| Fig. S3. Determination of binding stoichiometry of TPAMB with cDNA5                             | S7              |
| Fig. S4. Photograph showing fluorescence emission of TPAMB with the selective cDNA sequences    | S8              |
| Fig. S5. CD spectra of cDNA5 (2 $\mu$ M), and upon incubation with TPAMB                        | S8              |
| Fig. S6. PAGE image of the cDNA sequences poststained with ThT (2 $\mu$ M)                      | S9              |
| 8. Compound characterization data                                                               | S10             |

## 1. General Information

All chemical reagents and solvents were purchased from Merck. Single stranded oligos were procured from Integrated DNA Technologies (IDT).  $^1\text{H}$  and  $^{13}\text{C}$  NMR for molecular characterization were recorded on a Bruker AV-400 MHz spectrometer and chemical shifts in the spectra are reported as parts per million (*ppm*) with TMS (tetramethylsilane) as the internal standard. For confirmation of molecular weight, high resolution mass spectra (HRMS) were recorded on Agilent Technologies 6538 UHD Accurate-Mass Q-TOF LC/MS spectrometer. CD spectra were recorded in a quartz cuvette of 1 cm path length on a Jasco-815 spectropolarimeter (Japan). For fluorescence lifetime measurements a 560 nm laser with pulse repetition of 1 MHz was used in a Horiba Delta Flex time-correlated single photon counting (TCSPC) instrument. Fluorescence Imaging of PAGE images of DNA-probe solutions were captured in Bio Rad ChemiDoc MP imaging system.

## 2. Synthesis of molecular probe TPAMB and TPAEB

To a solution of 2-methyl benzothiazole (5 mmol) dissolved in dichloromethane (5 mL), excess methyl iodide (20 mmol) was added, and refluxed in a sealed tube for 6 h. A white precipitate indicated formation of product. Completion of reaction was monitored by thin layer chromatography (TLC). After completion of reaction, the precipitate was filtered and washed with diethyl ether to remove the (unreacted starting material) excess methyl iodide and unreacted 2-methylbenzothiazole, and dried to obtain the product (N-methyl-2-methylbenzothiazole) in quantitative yield.

To a stirred solution of N-methyl-2-methylbenzothiazole in ethanol, piperidine was added. After stirring for 10 min, 4-(N, N-diphenylamino)benzaldehyde was dissolved in ethanol and added

dropwise. The reaction mixture was stirred over a magnetic stirrer stabilized at 60 °C. Following completion of the reaction, the solvent was evaporated *in vacuo* and purification was done using semipreparative RP-HPLC (grad. 70-85% acetonitrile in water, 12 min) to obtain TPAMB as pure product. A dark violet powder was obtained after lyophilization. Yield 56%.

<sup>1</sup>H NMR (400 MHz, DMSO-*d*<sub>6</sub>) 8.37 (d, *J* = 8.1, 1H), 8.18(d, *J* = 8.4, 1H), 8.12 (d, *J* = 15.6, 1H), 7.91 (d, *J* = 8.84, 2H), 7.83 (t, *J* = 8.32, 1H), 7.78(d, *J* = 15.64, 1H), 7.74 (t, *J* = 8, 1H), 7.4348 (t, *J* = 7.6, 4H), 7.24 (t, *J* = 7.44, 2H), 7.2 (d, *J* = 7.48, 4H), 6.9 (d, *J* = 8.76, 2H), 4.29 (s, 3H). <sup>13</sup>C NMR (100 MHz, DMSO-*d*<sub>6</sub>): 171.7, 151.3, 148.6, 145.5, 141.9, 137.1, 131.8, 129.9, 129.1, 127.9, 127.3, 126.1, 125.4, 124, 118.9, 116.5, 110.1, 36.1. HRMS (ESI, *m/z*) calculated for [C<sub>28</sub>H<sub>23</sub>N<sub>2</sub>S]<sup>+</sup> 419.1576, observed 419.1576.

TPAEB was synthesized following similar synthetic protocols as in TPAMB.

Dark pink solid, Yield 74 %. <sup>1</sup>H NMR (400 MHz, DMSO-*d*<sub>6</sub>) 8.39 (d, *J* = 8.88, 1H), 8.24 (d, *J* = 8.44, 1H), 8.15 (d, *J* = 15.4, 1H), 7.95 (d, *J* = 8.92, 2H), 7.84 (t, *J* = 8.52, 1H), 7.78 (d, *J* = 15.52, 1H), 7.75 (t, *J* = 8, 1H), 7.44 (t, *J* = 7.6, 4H), 7.25 (t, *J* = 7.4, 2H), 7.20 (d, *J* = 7.4, 4H), 6.91 (d, *J* = 8.9, 2H), 4.91 (q, *J* = 7, 2H), 1.45 (t, *J* = 7.12, 3H). <sup>13</sup>C NMR (100 MHz, DMSO-*d*<sub>6</sub>): 171.3, 151.4, 149.2, 145.5, 140.8, 131.9, 129.9, 129.3, 127.8, 126.1, 125.4, 124.2, 118.9, 116.2, 109.5, 44.1, 14. HRMS (ESI, *m/z*) calculated for [C<sub>29</sub>H<sub>25</sub>N<sub>2</sub>S]<sup>+</sup> 433.1733, observed 433.1741.

### 3. Fluorescence screening of molecular probes with cDNA GQs

The fluorescence screening for identification of lead molecular probe and target cDNA GQ was performed in a 384 transparent bottom microplate. 200 μL of DNA (1 μM) in Tris. HCl (100 mM KCl) was treated with molecular probes to a final concentration of 4 μM. 50 μL of the solution

was added per well and the emission maxima were recorded and plotted in Graph Pad Prism software.

#### **4. Jobs plot analysis for interaction of TPAMB with cDNA5**

Continuous variation method was used for determination of binding stoichiometry between TPAMB and cDNA5. Briefly, a series of solution with sequential decrease in the mole fraction of TPAMB was prepared. Total concentration of [TPAMB + cDNA] was kept constant at 0.5  $\mu\text{M}$ . The fluorescence intensities were recorded, and values were plotted against corresponding mole fractions. The mole fraction corresponding to the maxima was used to determine the stoichiometry of binding.

#### **5. Gel electrophoresis of TPAMB with cDNA GQ**

15  $\mu\text{L}$  cDNA (1 to 6) solutions of 2  $\mu\text{M}$  were prepared in GQ stabilizing buffer. 5  $\mu\text{M}$  of TPAMB was added and the solutions were incubated for 10 min. 15 % PAGE gel was prepared with 1X TBE (supplemented with 100 mM KCl) as the running buffer. A constant voltage of 80 V was applied for 60 min for electrophoretic separation. Next the gel was stained with SYBR gold and imaged independently in the appropriate excitation of SYBR gold and TPAMB in a Bio Rad ChemiDoc MP imaging system.

## 6. Tables

**Table S1.** List of identified sequences with –CC- repeats and their length, and position in the genome of SARS-CoV-2.

| Name | Position | Length | Sequence                              |
|------|----------|--------|---------------------------------------|
| C1   | 10015    | 25     | CCAACCACCACAAACCTCTATCACC             |
| C2   | 15924    | 18     | CCTTCCTTACCCAGATCC                    |
| C3   | 13255    | 27     | CCGTTGCCACATAGATCATCCAAATCC           |
| C4   | 15924    | 28     | CCCAGATCCATCAAGAATCCTAGGGGCC          |
| C5   | 15       | 23     | CCTTCCCAGGTAACAAACCAACC               |
| C6   | 15924    | 37     | CCTTCCTTACCCAGATCCATCAAGAATCCTAGGGGCC |

**Table S2.** Table for the photophysical properties of the probes TPAEB and TPAMB.

| Molecular code | Absorbance max $\lambda_{ex}$ (nm) | Emission max $\lambda_{ex}$ (nm) | Stokes Shift (nm) |
|----------------|------------------------------------|----------------------------------|-------------------|
| TPAMB          | 497                                | 580                              | 83                |
| TPAEB          | 480                                | 637                              | 157               |

**Table S3.** Summary of fluorescence decay of TPAMB with respect to different DNA targets.

| Target DNA | $\lambda_{ex}$ (nm) | $\lambda_{monitored}$ (nm) | $t_1$ (ns) | $\langle t_{avg.} \rangle$ (ns) |
|------------|---------------------|----------------------------|------------|---------------------------------|
| cDNA3      | 510                 | 585                        | 3.9 (100%) | 3.9                             |
| cDNA5      | 510                 | 585                        | 3.8 (100%) | 3.8                             |
| BCL2       | 510                 | 585                        | 2.6 (100%) | 2.6                             |

**Table S4.** List of DNA and RNA sequences used in the work.

| Name               | Length | Sequence                                       | Conformation       |
|--------------------|--------|------------------------------------------------|--------------------|
| KRAS               | 28     | GGGAGGGAGGGAAGGAGGGAGGGAGGGA                   | Parallel GQ        |
| Thrombin           | 17     | GGGTTGGTGTGGTTGGA                              | Antiparallel GQ    |
| VEGF               | 37     | GGGGGCGGGCCGGGGGCGGGGTCCC GGCGGGGC<br>GGAG     | Parallel GQ        |
| Tel 22             | 22     | AGGGTTAGGGTTAGGGTTAGGG                         | Antiparallel GQ    |
| BCL2               | 27     | CGGGCGCGGAGGAATTGGGCGGGAGC                     | Hybrid GQ          |
| c-MYC              | 27     | TGGGGAGGGTGGGGAGGGTGGGGAAGG                    | Parallel GQ        |
| R1                 | 20     | GGTATGTGAAAGGTTATGG                            | Antiparallel GQ    |
| R2                 | 15     | GGCTGGCAATGGCGG                                | Antiparallel GQ    |
| R3                 | 20     | GGTTGGACCTTTGGTGCAGG                           | Antiparallel GQ    |
| R4                 | 26     | GGTGTGTTGGAGAAGGTTCCGAAGG                      | no GQ              |
| R1 RNA             | 20     | GGUAUGUGAAAGGUUAUGG                            | Parallel GQ        |
| mt9438             | 20     | GGCGTAGGTTTGGTCTAGGG                           | Antiparallel GQ    |
| mt6363             | 26     | AGGGACGCGGGCGGGGATATAGGGT                      | Hybrid GQ          |
| Rb <i>i</i> -motif | 18     | GCCGCCAAAACCCCCG                               | <i>i</i> -motif    |
| RO1C               | 30     | AGACGCCATACACCTTTCCAATACCGACAT                 | no <i>i</i> -motif |
| A20T20             | 20     | AAAAAAAAAAAAAAAAAAAAA<br>: TTTTTTTTTTTTTTTTTTT | dsDNA              |
| R1:R1C             | 20     | GGTATGTGAAAGGTTATGG :<br>CCATACACCTTTCCAATACC  | dsDNA              |
| cDNA1              | 25     | GGTTGGTGGTGGTTGGAGATAGTGG                      | Antiparallel GQ    |
| cDNA2              | 18     | GGAAGGAATGGGTCTAGG                             | -                  |
| cDNA3              | 27     | GGCTTCGGTGTATCTAGTAGGTTTAGG                    | Antiparallel GQ    |
| cDNA4              | 28     | GGGTCTAGGTAGTTCTTAGGATCCCCGG                   | Hybrid             |
| cDNA5              | 23     | GGAAGGGTCCATTGTTGGTTGG                         | Antiparallel GQ    |
| cDNA6              | 37     | GGAAGGAATGGGTCTAGGTAGTTCTTAGGATCCC<br>CGG      | Hybrid             |
| Telo GQ            | 21     | AGGGTTAGGGTTAGGGTTAGGG                         | Antiparallel       |

## 7. Figures

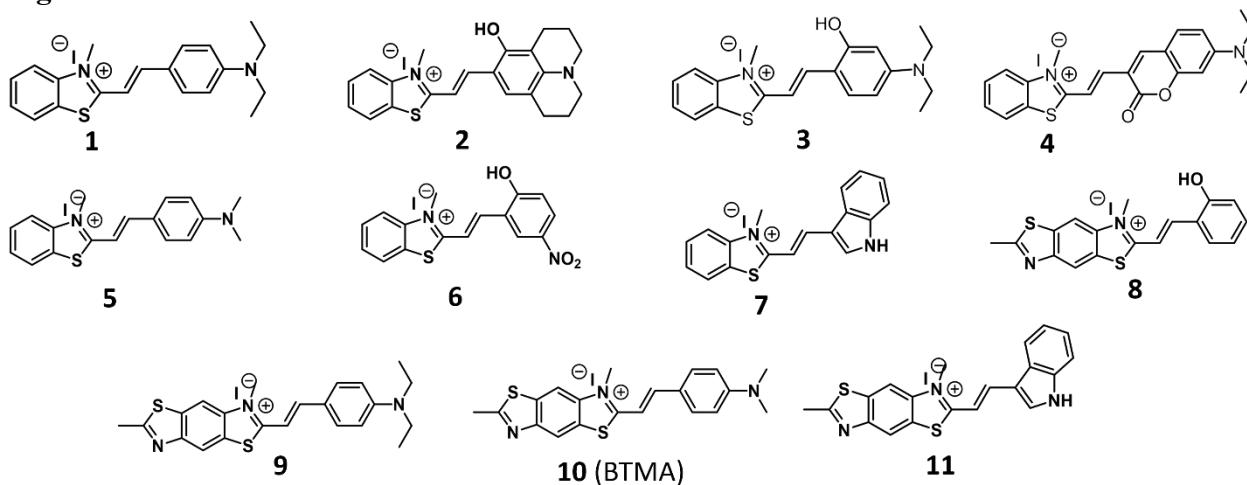

**Fig. S1.** Chemical structure of probes 1-11 used in fluorescence screening studies.

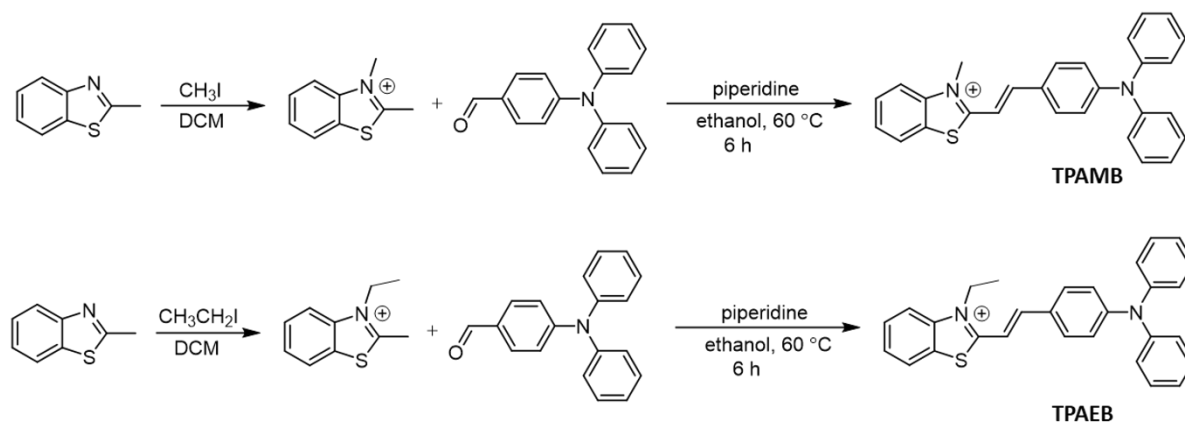

**Fig. S2.** Synthesis of molecular probes TPAMB and TPAEB.

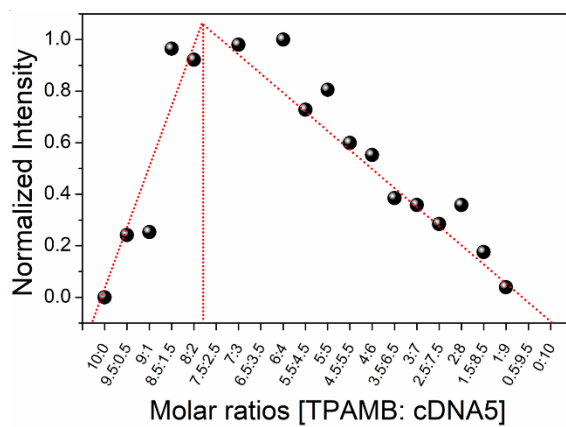

**Fig. S3.** Determination of binding stoichiometry of TPAMB with cDNA5.



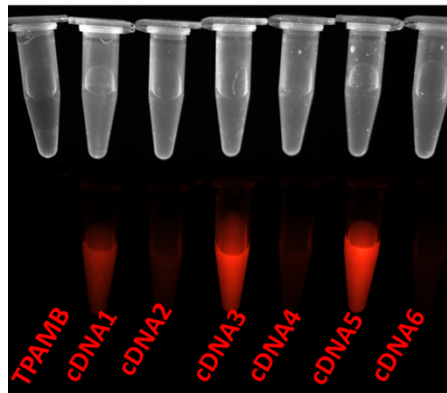

**Fig. S4.** Photograph showing fluorescence emission of TPAMB with the selective cDNA sequences.

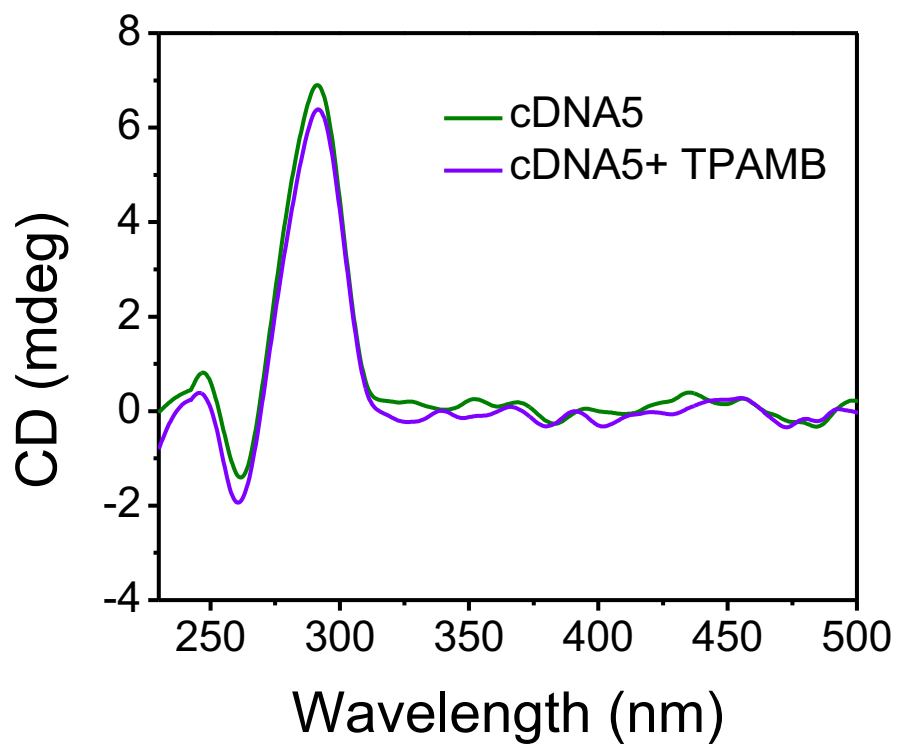

**Fig. S5.** CD spectra of cDNA5 (2 μM), and upon incubation with TPAMB.

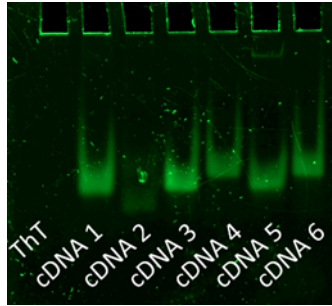

**Fig. S6.** PAGE image of cDNA sequences poststained with ThT (2  $\mu$ M).

## 8. Compound characterization data

$^1\text{H}$  and  $^{13}\text{C}$  NMR data for TPAMB

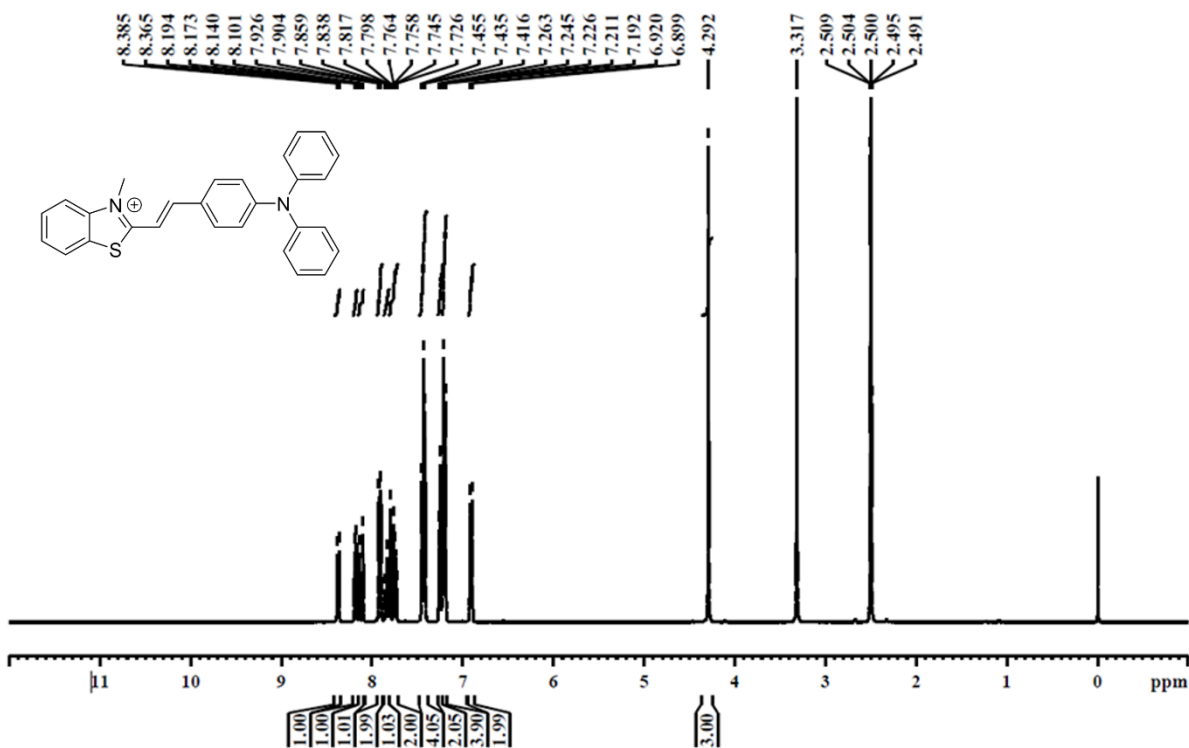

Dec28-2021 tgsu 2phnbz  
C13CPD DMSO {D:\pratihar} JNCASR 48

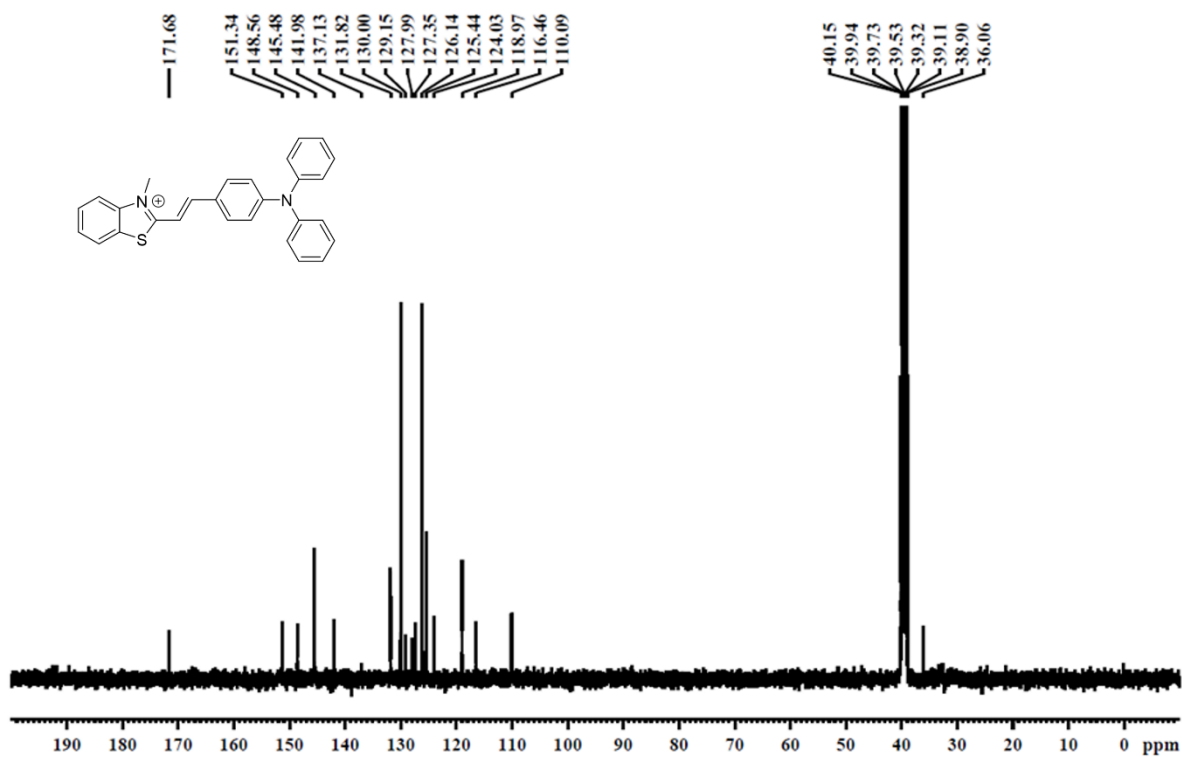

$^1\text{H}$  and  $^{13}\text{C}$  NMR data for TPAEB

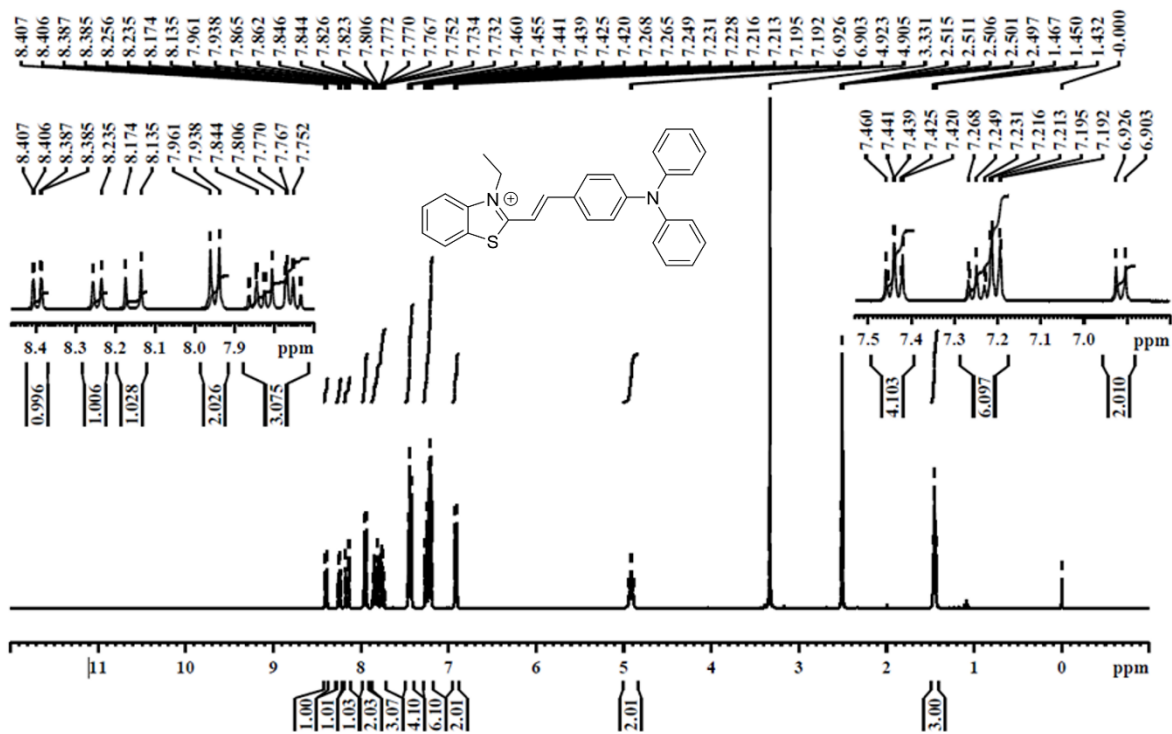

Jan10-2022 tgsu bzetphn  
C13CPD DMSO (D:\pratihar) JNCASR 10

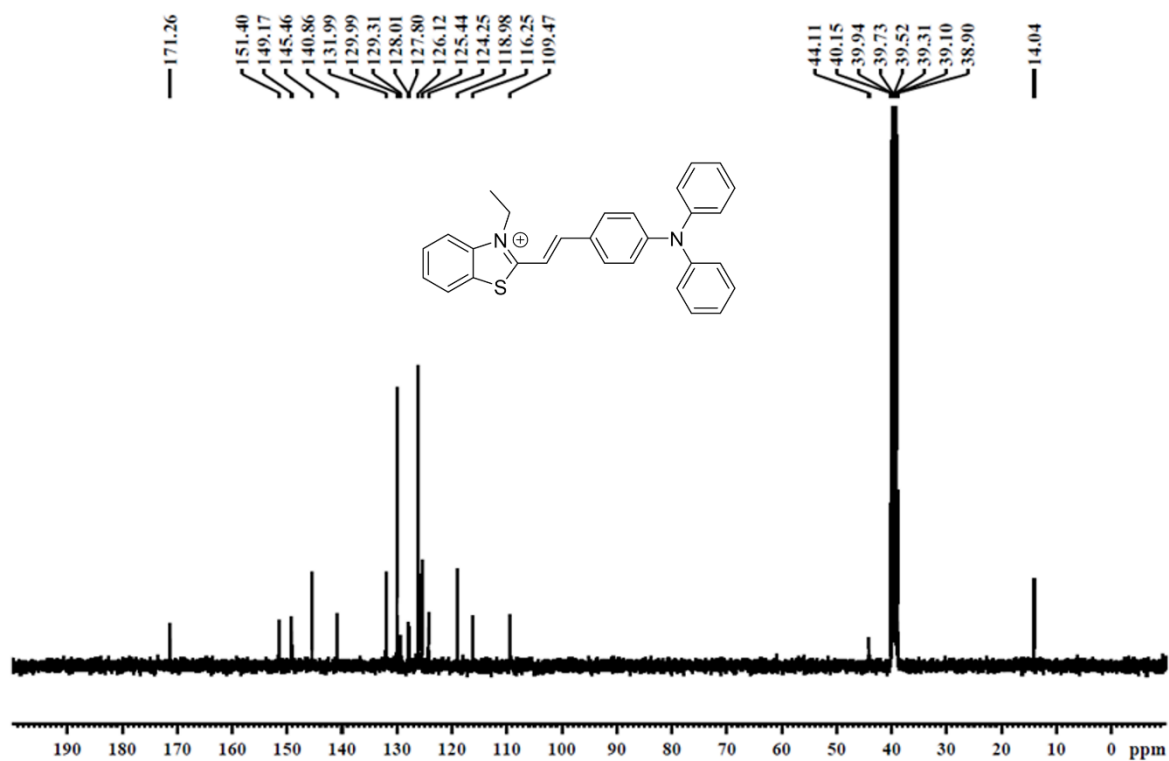

HRMS data for TPAMB and TPAEB.

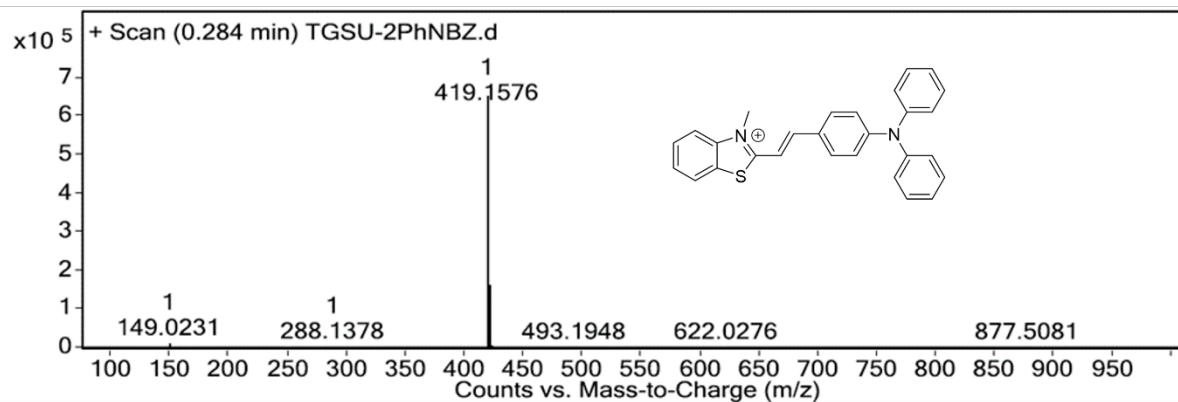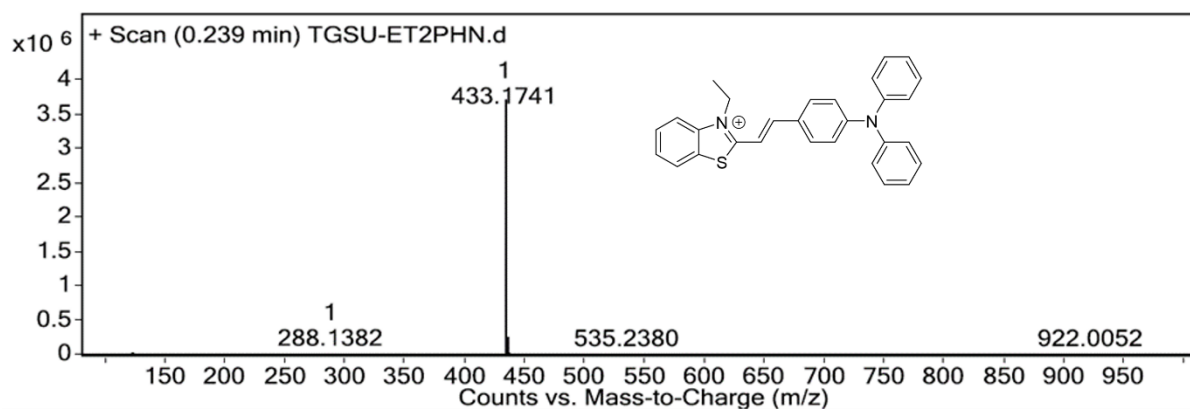

HPLC trace for TPAMB

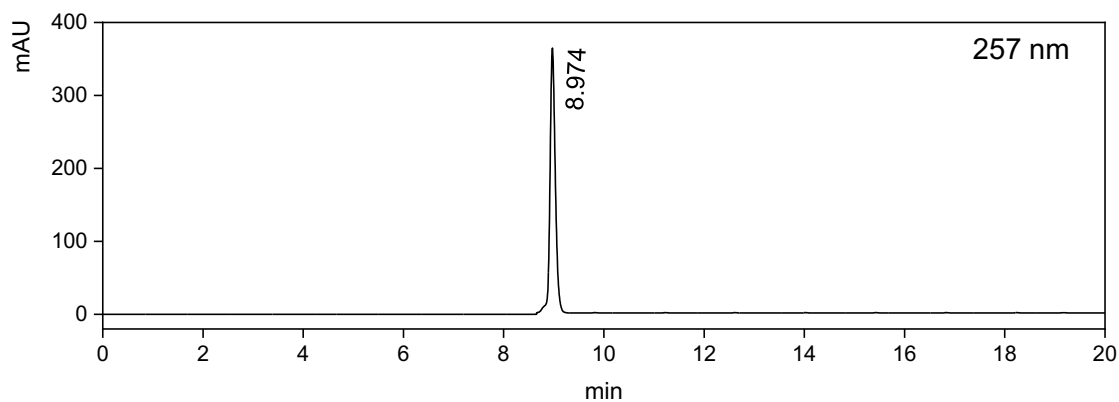

HPLC trace for TPAEB

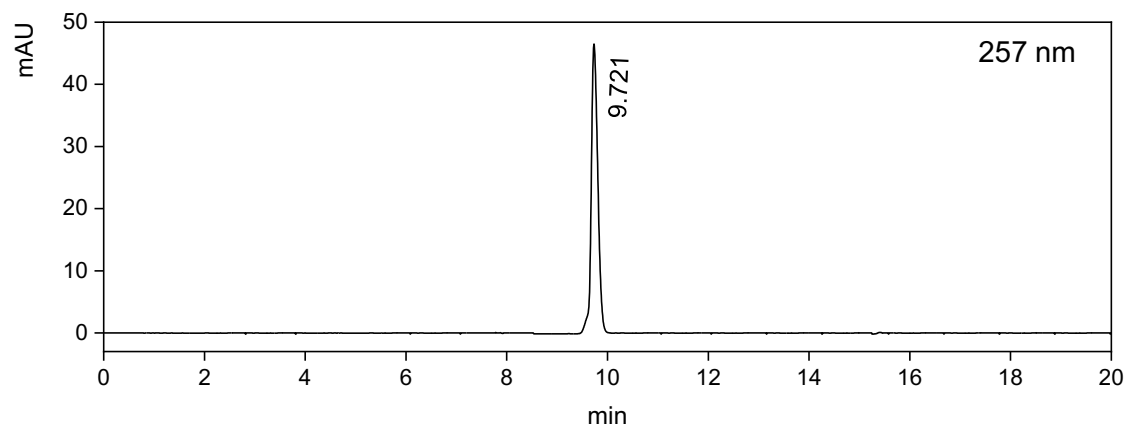

Supplement: d3cc00740e1.pdf [file d3cc00740e1.pdf]
